# Supplementary material for: Kistamicin biosynthesis reveals the biosynthetic requirements for production of highly crosslinked glycopeptide antibiotics
Source: PubMed Central journal article supplement (PMC6565677; doi:10.1038/s41467-019-10384-w), 2019-06-13
Supplement: 41467_2019_10384_MOESM2_ESM.pdf [file 41467_2019_10384_MOESM2_ESM.pdf]

## Description of Additional Supplementary Files

**File name:** Supplementary Data 1

**Description:** Yield crosslinking [%] of synthesized peptides by OxyA, OxyC or OxyB<sub>tei</sub>
